# Supplementary material for: Architecture and mechanism of the late endosomal Rab7-like Ypt7 guanine nucleotide exchange factor complex Mon1–Ccz1
Source: PubMed Central journal article supplement (PMC5216073; doi:10.1038/ncomms14034), 2017-01-04
Supplement: ncomms14034-s1.pdf [file ncomms14034-s1.pdf]

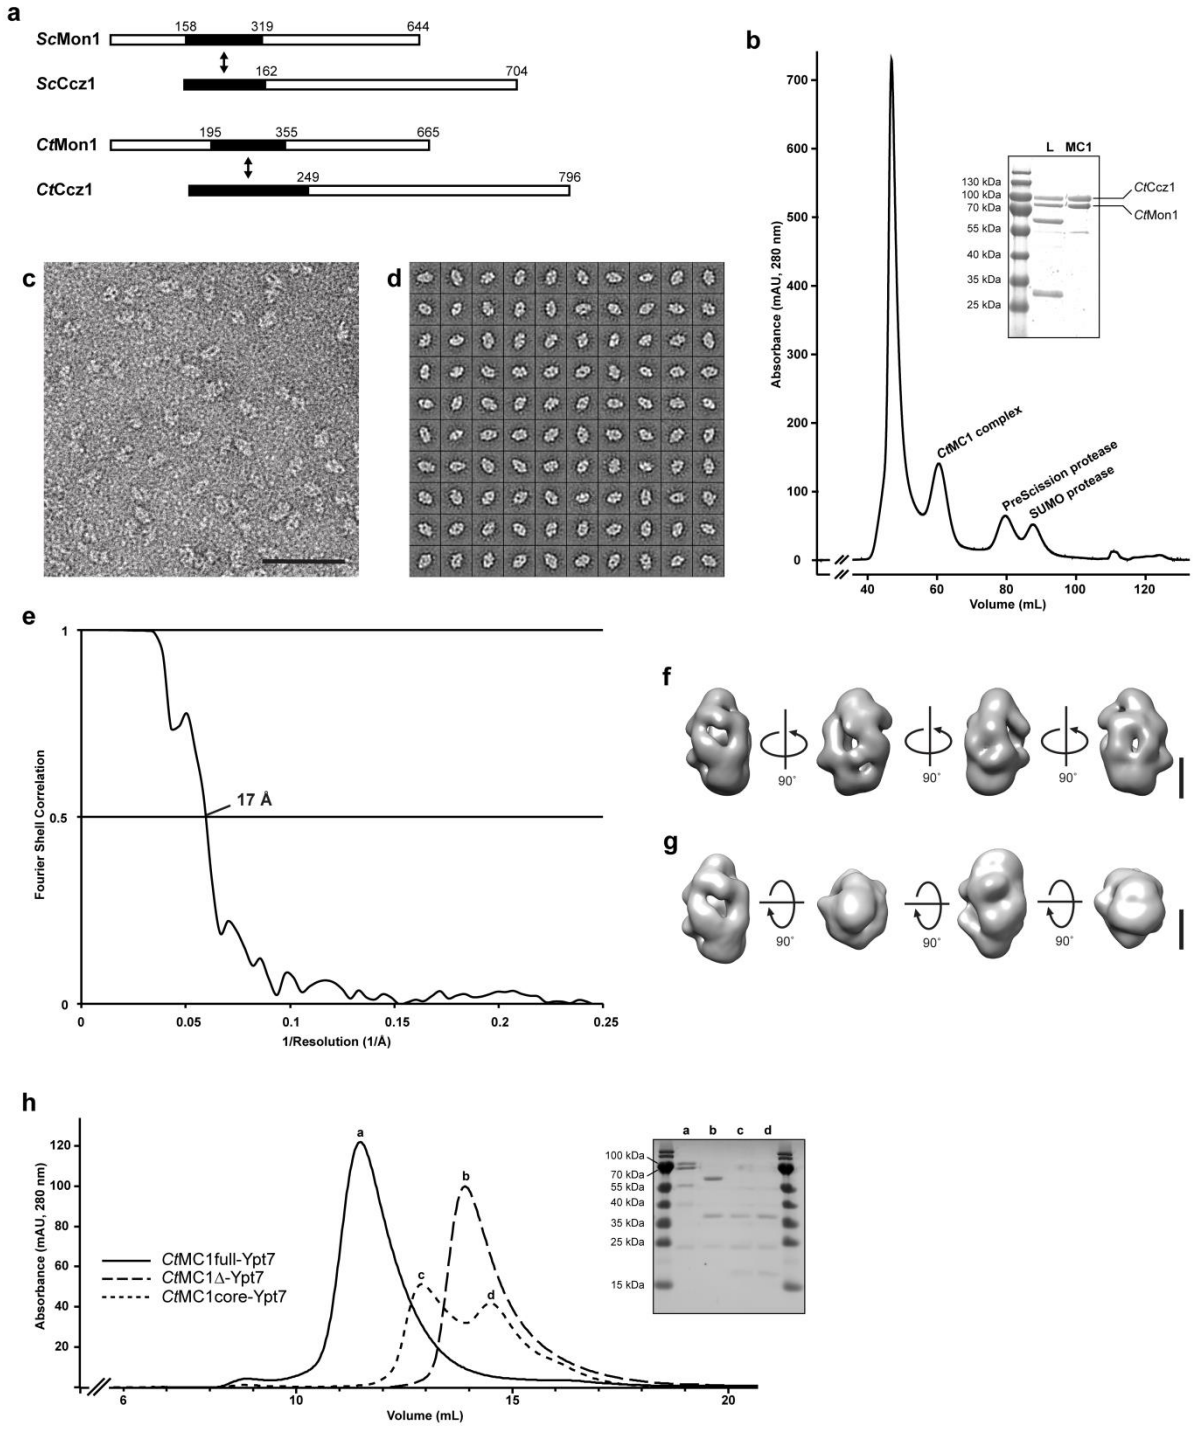

**Supplementary Figure 1.** Architecture of MC1. (a) Domain organization of *S. cerevisiae* and *C. thermophilum* Mon1 and Ccz1. The positions of the longin domains are marked by black bars. (b) Purification of full-length CtMC1 on a Superdex 200 (16/600) gel filtration column for electron microscopy. L: load; MC1: pooled peak fractions of CtMC1. (c) Micrograph of negatively stained CtMC1 complex. Scale bar corresponds to 50 nm. (d) 100 class averages from 22,165 particles that were initially used as templates for *ab initio* 3D structure determination; box size is 24x24 nm) (e) Fourier Shell Correlation of the negative stain reconstruction of the full-length Mon1-Ccz1 complex. (f) Different side and (g) top views of the CtMC1 3D-reconstruction rotated by 90°. Scale bar is 5 nm. (h) Analysis of MC1 and subcomplexes bound to Ypt7 on a Superdex200i (10/30) gel filtration column. CtMC1full: Mon1 1-665, Ccz1 1-796; CtMC1Δ: Mon1 140-665, Ccz1 1-249; CtMC1core: Mon1 195-355, Ccz1 1-249. Peaks correspond to a: ~360 kDa; b: ~85 kDa; c: ~150 kDa d: ~60 kDa).

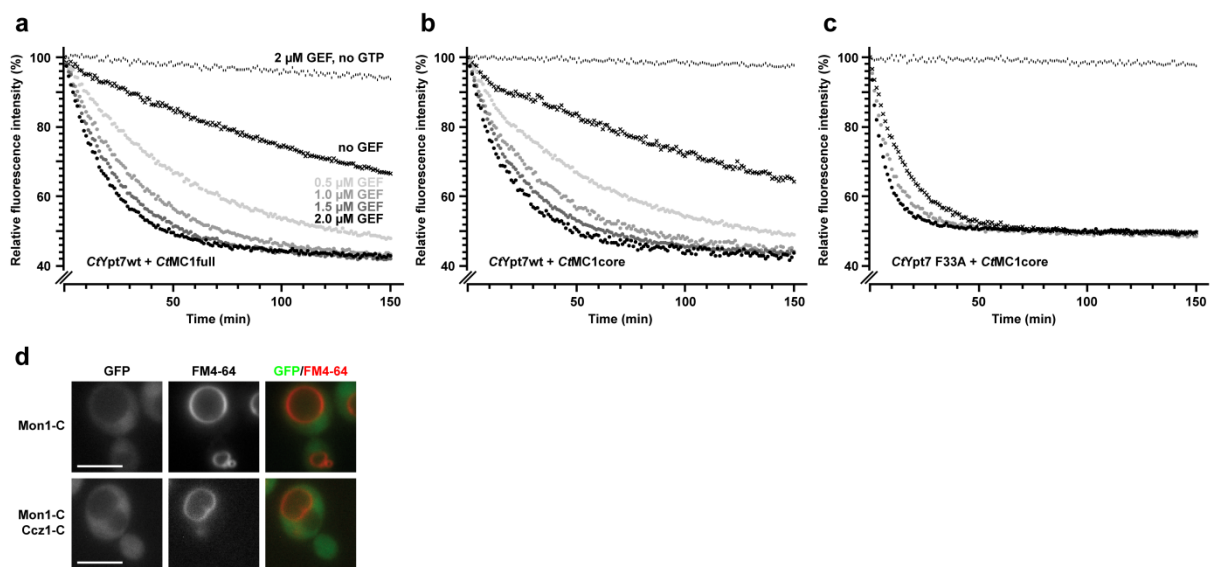

**Supplementary Figure 2.** Release of MANT-GDP was monitored in the presence of GTP or GEF only or both for CtYpt7 with CtMC1full (a), CtYpt7 with CtMC1core (b) and CtYpt7 F33A with CtMC1core (c). Initial rates were determined for different GEF concentrations. (d) GFP-tagged Mon1 C-terminus (Mon1-C) and a fusion between the Mon1 and Ccz1 C-termini (Mon1-C Ccz1-C) do not localize to endosomal structures when expressed in a wild-type background. Scale bars represent 5 μm.

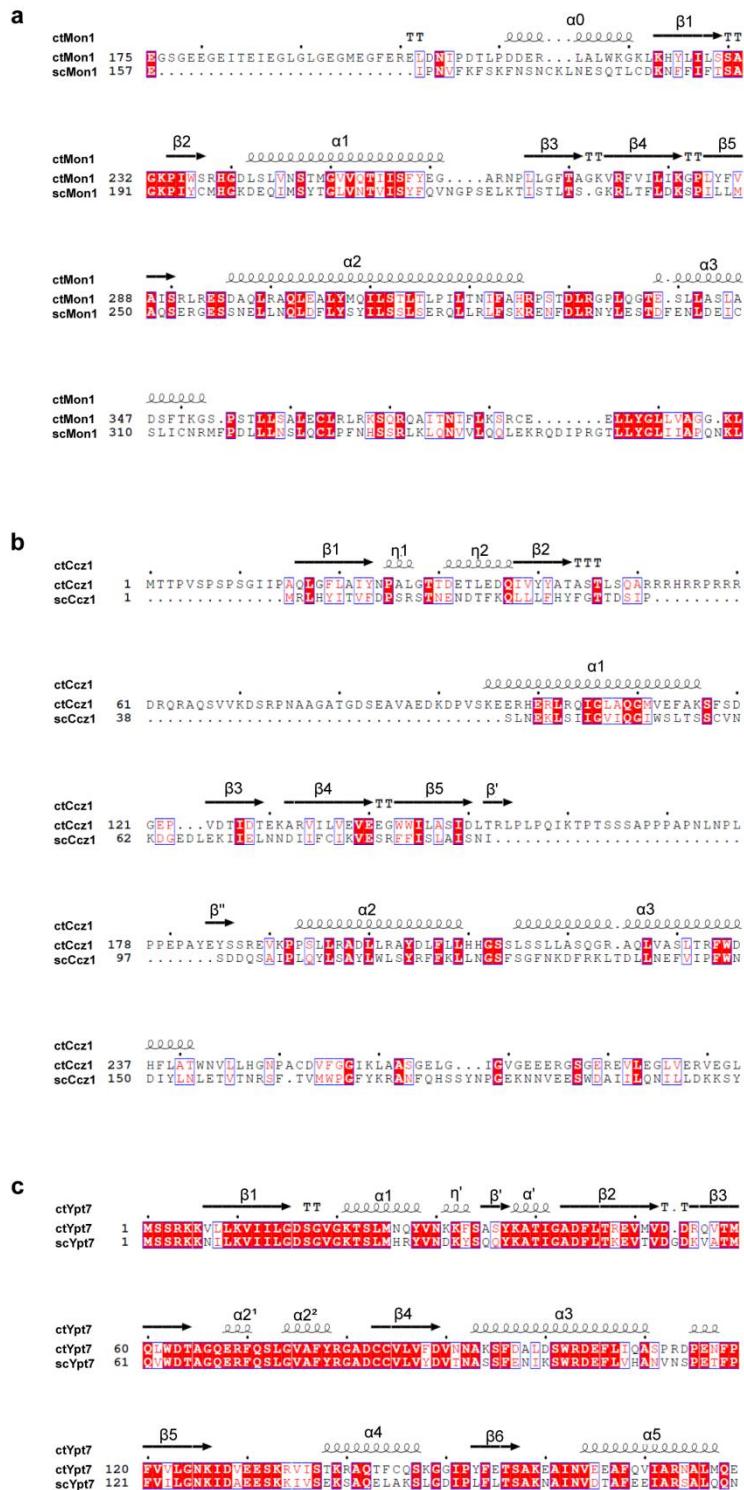

**Supplementary Figure 3.** A multiple sequence alignment of the (a) Mon1 longin domain, (b) Ccz1 longin domain and (c) of Ypt7 from *C. thermophilum* and *S. cerevisiae* was generated with ClustalW(1) and visualized with ESPript(2). Similar and conserved positions are marked by red font or boxes, respectively. Secondary structure elements as observed in the CtMC1core-Ypt7 crystal structure are labeled and shown above the alignment.

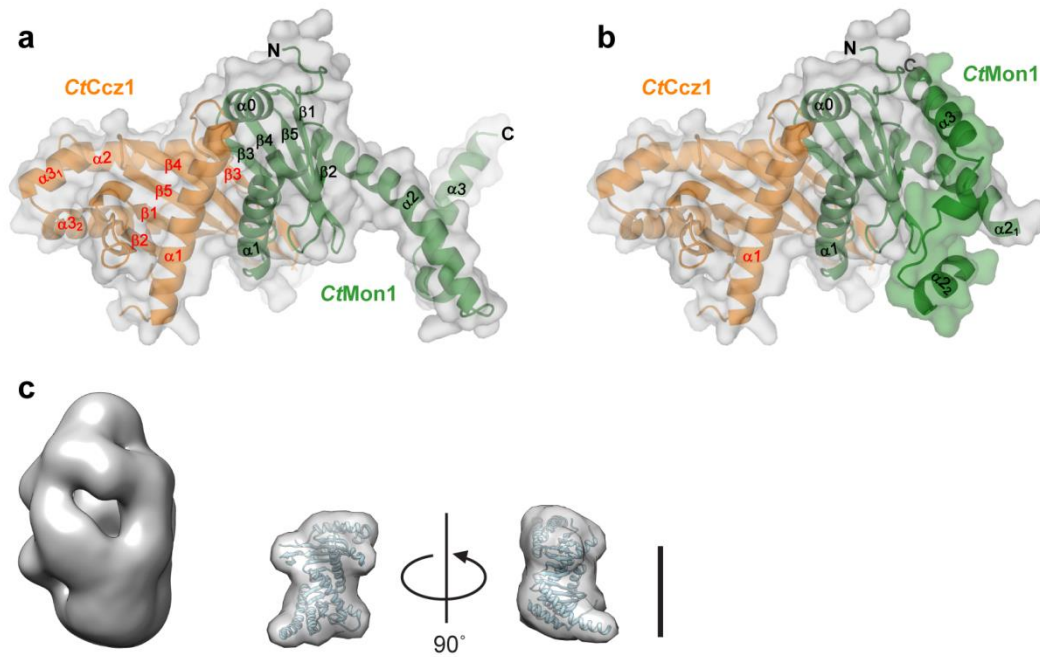

**Supplementary Figure 4.** Domain swap in the crystal structure of the CtMC1core complex. (a) Structure of the Mon1-Ccz1 heterodimer as observed in the crystal with labeled secondary structure elements. Helix  $\alpha 3$  of Mon1 undergoes a domain swap and is swung out to interact with the second copy of Mon1 in the asymmetric unit. (b) Corrected functional unit of the Mon1-Ccz1 heterodimer. Helix  $\alpha 2$  of Mon1 is interrupted by proline 317, which is the likely hinge of the domain swap. Thus, the  $\alpha 2$ - $\alpha 3$  linker region and helix  $\alpha 3$  of Mon1 is substituted by the equivalent segment from the second copy of Mon1. (c) Domain swap corrected model of the Mon1-Ccz1 longin heterodimer at 17Å resolution shown in comparison to the negative stain EM reconstruction of the full complex on the left. Scale bar is 5 nm.

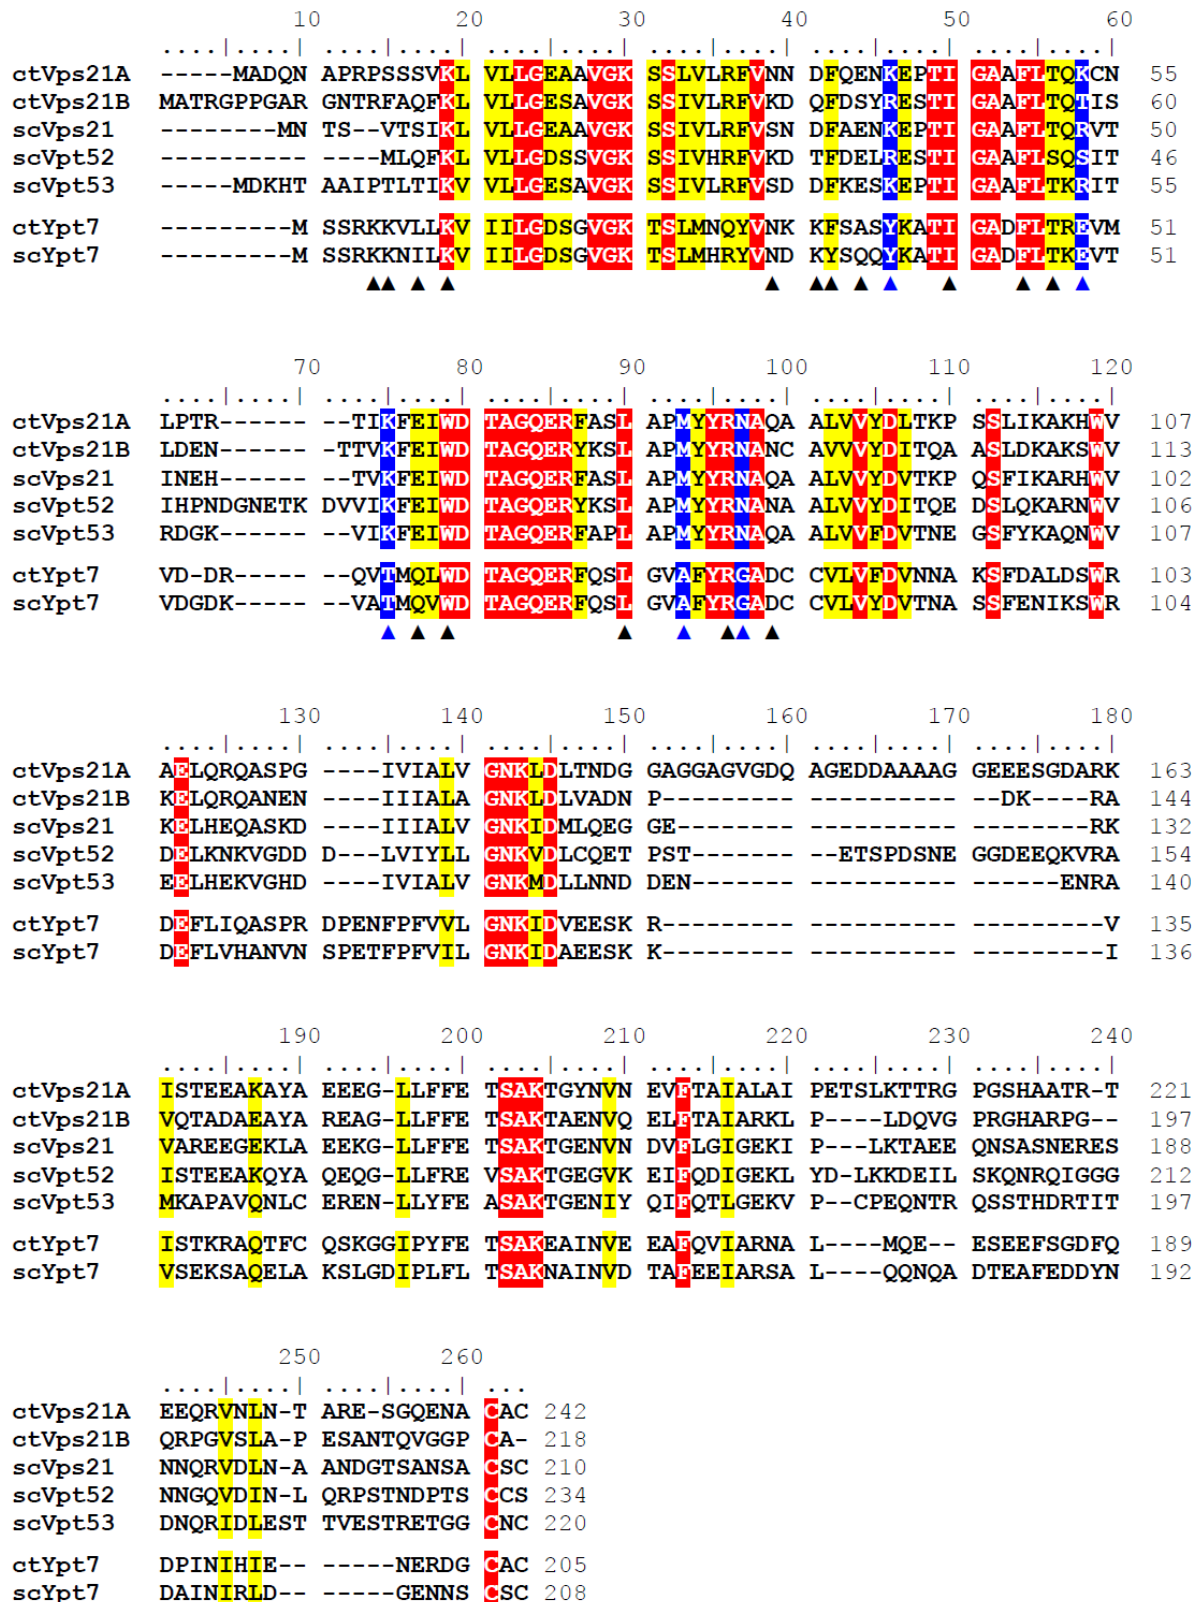

**Supplementary Figure 5.** Sequence alignment of Vps21 and Ypt7 isoforms from *S. cerevisiae* and *C. thermophilum*. Identical residues are highlighted in red and similar residues in yellow. Residues in Ypt7 that interact with MC1 are marked by triangles (▲). Interacting residues that are conserved for Ypt7 but differ in Vps21 are shaded blue.

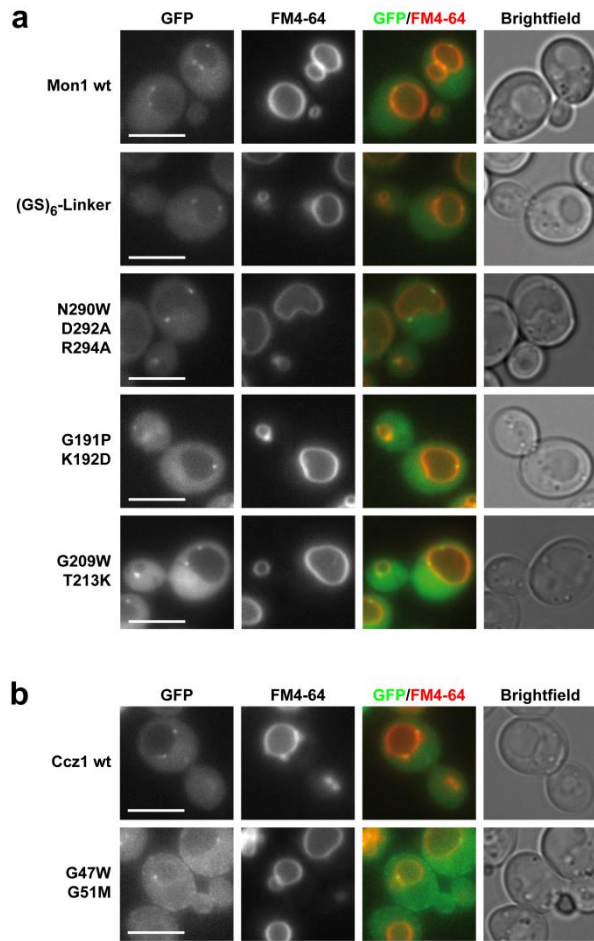

**Supplementary Figure 6.** Localization of MC1 mutants. GFP-tagged constructs of Mon1 (a) and Ccz1 (b) are expressed in a yeast wild-type background strain. Wild-type and mutant constructs show proper localization to dot-like endosomal structures. Scale bars represent 5  $\mu$ m.

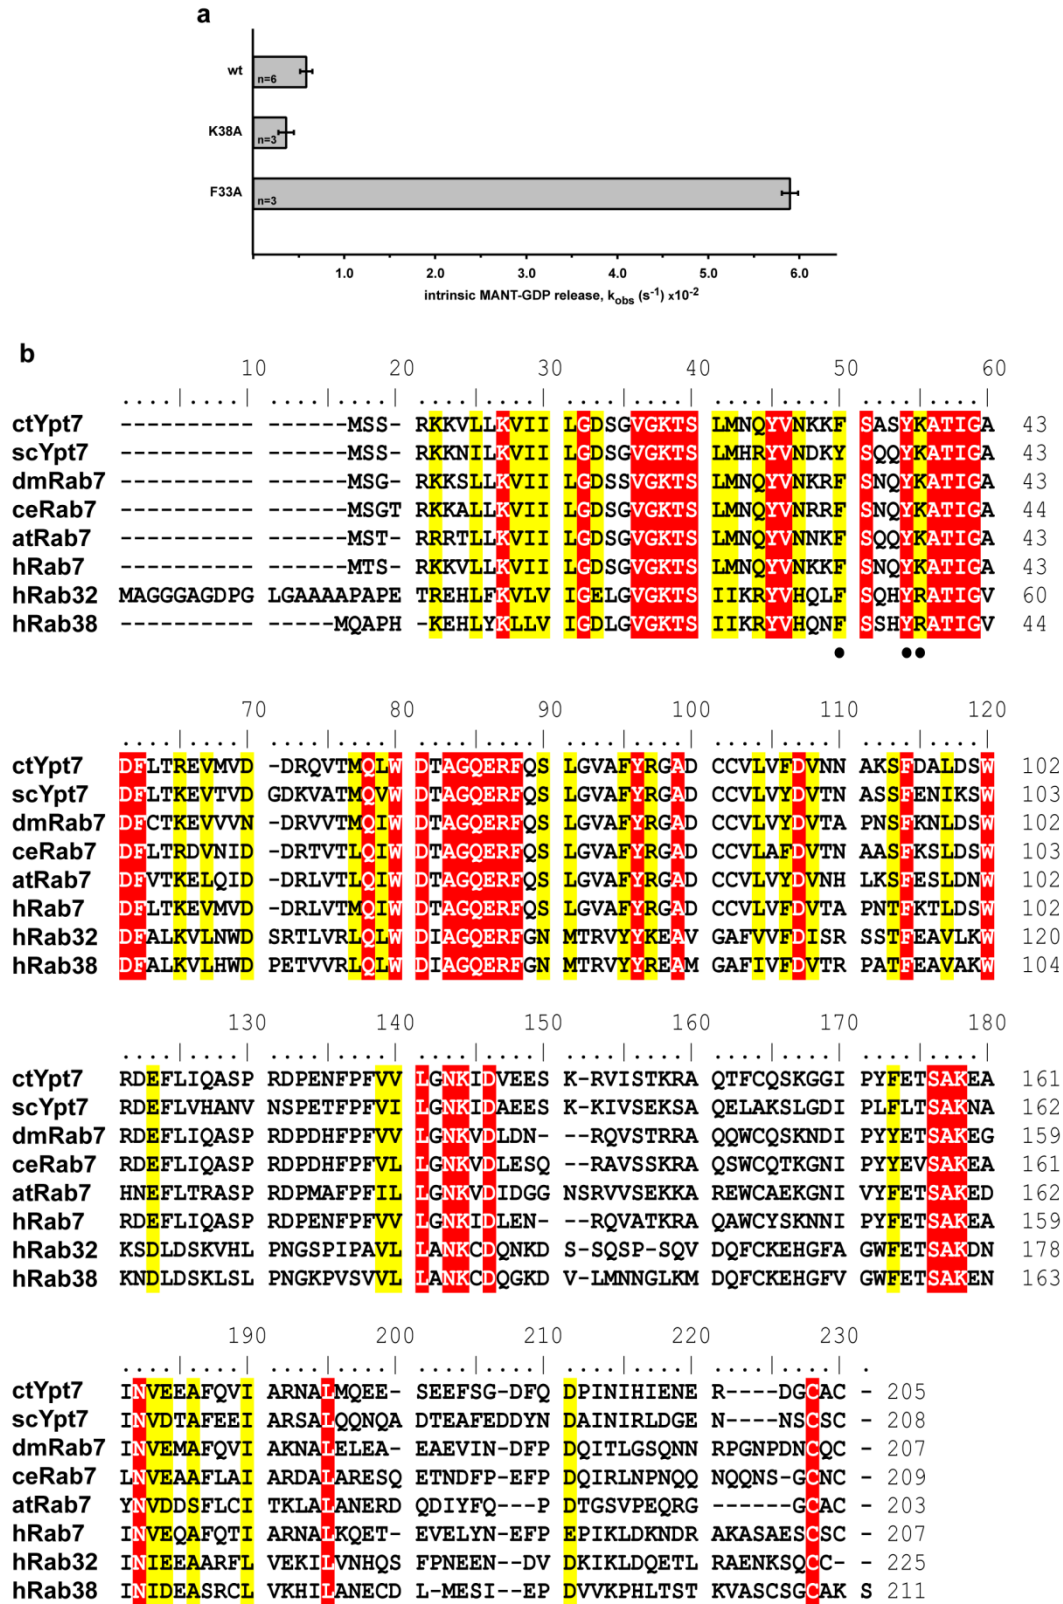

**Supplementary Figure 7.** (a) Intrinsic nucleotide release rates of CtYpt7 wild-type protein, K38A and F33A as determined by MANT-GDP dissociation. Data represent the mean of technical repeats with standard deviation. (b) Sequence alignment of Ypt7/Rab7 from different species, human Rab32 and human Rab38. Identical residues are highlighted in red and similar residues in yellow. The position the critical residues F33, Y37 and K38 in CtYpt7 are marked by a circle (●).

**Supplementary Table 1.** List of interacting residues between Ypt7 and Mon1-Ccz1.

| Ypt7 | Mon1                      | Ccz1             |
|------|---------------------------|------------------|
| K5   | Q336, <b>E339</b>         |                  |
| K6   | <i>R332</i>               |                  |
| L8   | L242                      |                  |
| K10  | A231                      |                  |
| N30  | <i>D211</i>               |                  |
| K32  | <b>D212</b>               |                  |
| F33  | D211, L244, <i>S247</i>   |                  |
| A35  | <i>S247</i> , V251        |                  |
| Y37  | V251                      | G110, E113, F114 |
| I41  | T254, F285                | L107, G110       |
| F45  | G250, V251, T254          |                  |
| T47  | <i>N246</i>               |                  |
| E49  | <i>S243</i>               |                  |
| T58  | L242, N246                |                  |
| Q60  | G232, N246, <i>G250</i>   |                  |
| W62  | A231, G250, Q253,<br>T254 |                  |
| L73  | F258                      |                  |
| A76  | <i>Q253</i> , <i>S257</i> |                  |
| R79  | <i>S230</i> , Q253        |                  |
| G80  | A231, P327, S328          |                  |
| D82  | <b>K233</b>               |                  |

Salt bridges and hydrogen bonds are highlighted by bold and italics font, respectively.



**Supplementary Table 2. Codon-optimized CtMC1 genes**

**CtMon1**

GGATCCATGACACAAAATAATGCTCCTGAAAGCGTAGCGGCAGAAGGCACCGTAGCGGGCCAACAGACCGACACCACCAAACCTGAAC  
CATCAAGTCAGCCGGCGCCTGAACCACCGTCCCAAGTTACCACTGACTTTCTCCAATAACAAGCCGAATGATGTGCCTGCTACTGAACC  
AGCATCTTCAAGCCCAAGACCGACAGAACCAGCCTGCTCCACCGCCTCCAAAACCTACCATTGCCTTGTCTCCACTGGACATCGCGACTG  
ACGTTTCTGATGGTACTCGCGGCACATTCCAGCCCGCCTCAGACTTCTGCGCAATCAGTCAGCACACCGTCAATTGCAAGCGGTGAT  
GTAACCTCTCAGCGGCACACCGATACTGCTAGTATCACGTCCGTTGACAGGTACCCTGCGTGGTGTGACTGGTACGGCTGGTACTGGCG  
TCACTGTTAGCTGGTATGGCCTGGGTCGTAAGCAAGGCCTGGAGAGTCTGCGCGCACAAACAGCAAGCCTGTGGCGAAGGTTGAG  
GCGAAGAAGGTGAAATTACTGAAATCGAAGGTCTGGGCTTAGGTGAAGGCATGGAAGGCTTGAACGTGAATTAGACAATATCCGGA  
TACATTGCCTGATGACGAAAGATTGGCTCTGTGGAAGGGCAAGCTGAAGCATTACTTGATCTTGAGTCCCGCAGGTAACCCGATCTGGTC  
ACGCCACGGCGATCTGTCAATTAGTCAATAGCACTATGGGTGTTGTGCAAAACAATTATCAGCTTTTATGAAGGCGCCAGAAACCCGTTGCT  
GGGTTTTACTGCGGGCAAGGTCGCTTCTGTAATTTTATGATCAAAGGTCCTCTGACTTCGTGGCAATTTACGCGCTGCGTGAAGCGATGC  
GCAGTTAAGAGCTCAATTAGAAGCATTGTATATGAGATTCTGAGTACCTGACTCTGCCGATTTTAAACGAACATCTTTGCCACAGACCG  
TCCACCGACTTACGCGCTCTTGAAGGCCTGAAAGTTTATGGCTTCTTAGCAGATTCGTTACGAAAGGTAGTCCATCCACCCTGT  
TATCGCCCTTGGAAATGTTAAGATTGCGCAAGTCTCAGCGCAAGCATTACAATATCTTTCTGAAATCCCGTTGCGAAGAATTGCTGT  
ATGGTTTATTGGTGGCGGGTGGCAAGCTGGTTCTGTGATTCTGTCGAAGAAACATTCTTACACCCGTCAGATCTGCAGTTAATCTTTAA  
CATGCTGTTCAATCTGGTGGCATTAAAGGTAATGGTGGCGAAAACCTGGATTCCATTGTGCCTGCCGCTTTTAAACACCGGCTATTT  
GTACATGTATGTTAGTTTCTGGATGACAAGGCCAGATGACCAGAATCAACCACCGGAATCGTCTAATTTGGATGCGAGCAATAAAAA  
CTCAAGCAATACTCTGATGACGATCTGACAGCTTAAATTTGATCTCGCCATCTCGTGAAGCCTTTTACGCGTTACAGTCTATGCGCACAC  
GTTTAGTGAGCCAAGTGAAGTACGGGTTATCTGCTTAATTCGTTGACCGCACTGTCTGGCAGACCGTCGATTACGCTATCTTACC  
TAAGACCCATTGCTGCATTTCTGTACAATCAAGACCAAACCTCAATGGTGTATGAGTCCCTGTGCTTTAACCCCTCCAGGTGCC  
ACAGCGACGGAACCTTATTGGCCGTAGAAAACCTGATGAGCGTATACGAAGAACTGCATGCTGCATTACAGCTCGCCATGCACACCT  
GCCTGTGCTATATTGACGGCTGATGAAAAAGAAGGTGAAGGCTTGGCATGCCTGGGTTGGAGTACCCAGCTTTGAAGTTTATTGTG  
TGGCACCTGGTTGCGTTGGTAGAGCTGGTATGGCGCTGAAGTCAACAGAGTAGTTCAGTGGGCAAGAAGAGAAGAAGAAAGATTATT  
TATTTTGGGTGGTGGTGTGTTTTGAGCGGCCGC

**CtCcz1**

GGATCCATGACCACTCCAGTCTCCCTTCGCCATCAGGCATTATTCCAGCACAGTTGGGTTTCTTAGCAATCTACAATCCAGCGTTGGGCA  
CCTACTGACGAAACACTGGAAGATCAAATTGTTTATTACGCTACGGCATCGACCTTATCTCAGGCCCTAGACGCCATCGTAGACCACGCC  
GTAGAGACCGCCAACGTGCTCAGTCGTTGTGAAAGATTCTCGCCGAATGCTGCAGGTGCAACAGGGCATAGCGAAGCCGTAGCGGA  
AGACAAAGATCCAGTTAGTAAGGAAGAACGTGATGAAAGACTGCGCCAAATTTGGTTTAGCTCAGGGCATGGTGGAAATTTGCAAAAAGTT  
TCTCCGATGGTGAACCGGTAGACACTATTGATACAGAAAAGCCCGCTTATCCTGGTAGAAGTTGAAGAAGTTGGTGGATTTTGGCG  
TCTATCGATCTGACCAAGTACCGTTGCCTCAAATCAAGACGCCTACCTCTTCAAGCGCTCCACCGCTGCACCGAATTTGAACCTCTGCC  
ACCGAAACCGCTTATGAATACAGTTCCTGTAAGTTAAACCACTCTCTGTTACGTCGCCACTTGCTGAGAGCTTATGATTTGTTTCTG  
TTGCATCACGGCTCGTCTTTGTCAAGCCTGTTAGCAAGTCAAGGTGCGGCCAGTTGGTGGCGTCCCTGACTCGTTTTTGGGACATTTCC  
TGGCCACATGGAATGTGTTGCTGCACGGTAACCCAGCGTGTGATGCTTCCGTTGGCATTAAATTAGCCGCTCCGGTGAATTTGGGTATC  
GGCGTAGGTGAAGAAGAACCGGCTCTGGTGAACGTGAAGTTTTAGAAGTTTTGGTAGAAAGAGTTGAAGCCTGGTGGATGTCGTA  
GTTGGTGCCTATGGTGGCCGCTTCTGAAAAAGGCCGGAAGAAGAACAATGGCTGGGTTTAGGTGGCGAAGTTGGTGAAGAAGACG  
GCGCCGATTTTTAGGCGTTGGTGCCTGGATAGAAAATCACTGCGCGTGTGGTCCAGTGGATGGAAGAAGTGTACGCTGGGGTGA  
AAATGCCTTCGGCGTTGGTGGCTCAAGAGCTGCACGCCGTAGACGCAAAAGAGGTGCTAAGGAAAGCCGCTGCTGAAAACCTGGCGCA  
GGTAAAAAGATTCCAATCGGCACTGGTACAGGCACGGAAGGTAACCTGGTGAAGCAGCAACGCCAGACATGGCAGGTACCCCGGGC  
AGTATGGATAAACTGTTTCTATTTGACTCTGGGTTACGGCACATCGTGGTCTTAGGTTTGTACGGCACCAGCACTCTTACAGACGCG  
ATCCAGGTAGTGTGTCAAAGGCATGGTCAAGGTTCCGAATCGGGTAAACCGCGTAGAGATCTGTCTACGGGTCAATTTCTGTTGGGCT  
TGAGTGAATGCTCCGAAGAAGAAGTACTCGTCTCAAGCTAACCTAAAGCAATTTCTGTCGAATTAAGCCGCTCATATCAATCCTAG  
CAGAAAAATCCACCGGAAGACCCACAGCCGCTGGGTAAGTGGGCCGGAATTACCTCGCATCACACAGCACGTCTGAGACCAAGTTA  
TCTATGCTCTCAGCCGTTTATCTATATCTGTTATTCTCAGAAATCACCCCTTCGCCATCTACGTGGCCGACCTTAGCTGAATCGTTGAT  
GCACAAGTCTCCATTACAGAAACCGTTGCTGCACTCAACCAGCTACCGCCAGAACGTCGGTAGTTGAAACCACTTCAAGCAGTGGT  
ACAACGACCAACATCAGATTTTTGACCTGGTTTATGATACAGAAACGCTGACCTTACAAAGTACTATTCCGAATATCCAGATCCATTCC  
CATACTCAGTACTACACCTACGGGTATAGCACCGGCCAACAGCATCACCAACAGAGCATTGGACGCGCTGGAAGCTTTACAACCC  
ACGCCAGATTTTGGCGATCTGCTCCTCGGGTCTGCAATCCCTACTGATCCATCTCTTTTACCCTCTGCCGTTGGGAAGAAGGCGAACG  
TACTTGTAAAACAGCAAGAGGTTGGTGGATTGTCTGGACCCGTGTGGTGAACACTCTCCACAGATGCCGTAAGCCTGCATCACGCGA  
GAGATGACGATGACAACGATGACGATGCCAGTTGCTCCGTGTTAGGCCATTTGCGTTCAGTCAGCAGTTCCACGCTGCAGGTAGTACTT  
CGTCTTCAAGCGTTCCGGTTTGGGTTTGGGTGCAATTCCTGGTCTGGGTGGCTTAGGTGGTGGGCGAGCAGATGGTGTACAAGACTG  
GCACAGGGTATTGGCATTGACACCAGACGCTATGTGGAAGGCTTGTGACCTCGTTGGGTAGATAAGCGGCCGC

**Supplementary Table 3.** List of primers used in this study

| <b>Protein construct</b>            | <b>Primer</b>                                                                                                        |
|-------------------------------------|----------------------------------------------------------------------------------------------------------------------|
| CtMon1<br>aa 141-665                | 5'-CGGGC <u>GGATCC</u> ACT GGT ACG GCT GGT GAC TTG-3'<br>5'-CGATT <u>GCGGCCGC</u> TCA AAA CAC ACC ACC ACC C-3'       |
| CtMon1<br>aa 195-355                | 5'-GCTCG <u>GGATCC</u> ATG GAA GGC TTC GAA CGT G-3'<br>5'-GAAAT <u>GCGGCCGC</u> TCA GGA TGG ACT ACC TTT CGT G-3'     |
| CtCcz1<br>aa 1-249                  | 5'-CCATA <u>GGATCC</u> ATG ACC ACT CCA GTC TCC CC-3'<br>5'-GTATT <u>GCGGCCGC</u> TTA GTT ACC GTG CAG CAA CAC-3'      |
| CtYpt7<br>full length               | 5'-GGCCG <u>GGATCC</u> ATG TCG TCC AGG AAG AAG G-3'<br>5'-CAAAT <u>GCGGCCGC</u> TCA GCA AGC GCA CCC ATC C-3'         |
| CtVps21<br>full length              | 5'-CGTTA <u>GGATCC</u> ATG GCT ACT CGG GGA CCG CCC-3'<br>5'-CAAAT <u>GCGGCCGC</u> TCA GCA AGC GCA AGG CCC GCC AAC-3' |
| ScMon1-ΔN<br>aa 158-644             | 5'-CCTAATGTATTCAAGTTTTTGAAG-3'<br>5'-GGATCTCTTGTACAGCTC-3'                                                           |
| ScMon1-ΔC<br>aa 158-319             | 5'-TAACTCGAGGGGGGGCC-3'<br>5'-ATCCGGGAACATTCTGTTACAGATTAGTG-3'                                                       |
| ScCcz1-ΔC<br>aa 1-162               | 5'-TAAGTCGACCTCGAGGGG-3'<br>5'-TGATCTATTCTGTTACAGTTTCTAGATTC-3'                                                      |
| ScMon1-ΔC<br>FYVE                   | 5'-CACTAATCTGTAACAGAATGTTCCCGATTGGCAATCTAGTCAAC-3'<br>5'-GAATTGGGTACCGGGCCCCCCTCGAGTTATCCTTGCAAGTCATTG-3'            |
| <b>Mutant</b>                       | <b>Primer</b>                                                                                                        |
| CtMon1<br>G232P/K233D               | 5'-GAGTTCGACCTGACCCGATCTGGTCACGC-3'<br>5'-AAGATCAAGTAATGCTTCAG-3'                                                    |
| CtMon1<br>G250W/T254K               | 5'-GCAAAAATTATCAGCTTTTATGAAGGC-3'<br>5'-ACAACCCACATAGTGCTATTGACTAATGAC-3'                                            |
| CtMon1<br>S328W/D330A/R332A         | 5'-CTTAGCCGGTCTTTGCAAGGCACT-3'<br>5'-GCGGTCCACGGTCTGTGGGCAAAGATG-3'                                                  |
| CtMon1<br>(GS) <sub>6</sub> -Linker | 5'-GGTTCTGGTTCTGGTAGTGAAAGTTTATTGGCTTCCTTAG-3'<br>5'-AGAACCAGAACCAGAGCCACTCAGAATCTGCATATAACAATG-3'                   |
| CtCcz1<br>G106W/G110M               | 5'-TCAGATGATGGTGGAATTTGCAAAAAG-3'<br>5'-GCTAACCAATTTGGCGCAGTCTTTC-3'                                                 |
| CtYpt7<br>F33A                      | 5'-CAACAAGAAGGCCAGCGCTAGCTAC-3'<br>5'-ACATATTGGTTCATCAAACCTC-3'                                                      |
| CtYpt7<br>Y37R                      | 5'-CAGCGCTAGCCGCAAGGCGACTATC-3'<br>5'-AACTTCTTGTTGACATATTGGTTC-3'                                                    |
| CtYpt7<br>K38A                      | 5'-CGCTAGCTACGCGGCGACTATC-3'<br>5'-CTGAACCTTCTGTTGACATATTG-3'                                                        |
| CtYpt7<br>E47R                      | 5'-CTTGACTCGGCGGTCATGGTGGACG-3'<br>5'-AAATCGGCGCCGATAGTC-3'                                                          |

|                                     |                                                                                                           |
|-------------------------------------|-----------------------------------------------------------------------------------------------------------|
| CtYpt7<br>T58K                      | 5'-TCGCCAGGTGAAAATGCAGCTCT-3'<br>5'-TCGTCCACCATGACCTCC-3'                                                 |
| CtYpt7<br>A76M/G80N                 | 5'-CCGCAACGCTGATTGCTGCGTGCTG-3'<br>5'-TAGAACATCACGCCGAGCGACTGGAA-3'                                       |
| CtYpt7<br>N125I                     | 5'-GTCGTGCTCGGGATCAAGATCGATGTTGAGG-3'<br>5'-CCTCAACATCGATCTTGATCCCGAGCACGAC-3'                            |
| <hr/>                               |                                                                                                           |
| ScMon1<br>G191P/K192D               | Cabrera <i>et al.</i> (3)                                                                                 |
| ScMon1<br>G209W/T213K               | Cabrera <i>et al.</i> (3).                                                                                |
| ScMon1<br>N290W/D292A/R294A         | 5'-CCTGGCAAATTATCTAGAAAGCACAGATTTTG-3'<br>5'-GCGAACCATCTCTTTTGGAAAATAACCTAAG-3'                           |
| ScMon1<br>(GS) <sub>6</sub> -Linker | 5'-GGGTCGGGTTCTGGATCAGATTTTGAAAATTTAGACGAAATATG-3'<br>5'-TGAACCGGAGCCAGATCCCGAAAGAATATACGAATATAAAAAATC-3' |
| CtCcz1<br>G47W/G51M                 | Cabrera <i>et al.</i> (3)                                                                                 |

### Supplementary References

1. Thompson, J. D., Higgins, D. G., and Gibson, T. J. (1994) CLUSTAL W: improving the sensitivity of progressive multiple sequence alignment through sequence weighting, position-specific gap penalties and weight matrix choice. *Nucleic Acids Res.* **22**, 4673–80
2. Robert, X., and Gouet, P. (2014) Deciphering key features in protein structures with the new ENDscript server. *Nucleic Acids Res.* **42**, W320–4
3. Cabrera, M., Nordmann, M., Perz, A., Schmedt, D., Gerondopoulos, A., Barr, F., Piehler, J., Engelbrecht-Vandré, S., and Ungermann, C. (2014) The Mon1-Ccz1 GEF activates the Rab7 GTPase Ypt7 via a longin-fold-Rab interface and association with PI3P-positive membranes. *J. Cell Sci.* **127**, 1043–51
